# Supplementary material for: L-dopa-Dependent Effects of GLP-1R Agonists on the Survival of Dopaminergic Cells Transplanted into a Rat Model of Parkinson Disease
Source: MDPI journal article supplement (doi:10.3390/ijms222212346), 2021-11-16
Supplement: s1 [file s1]

## Percentage of unilateral TH lesion

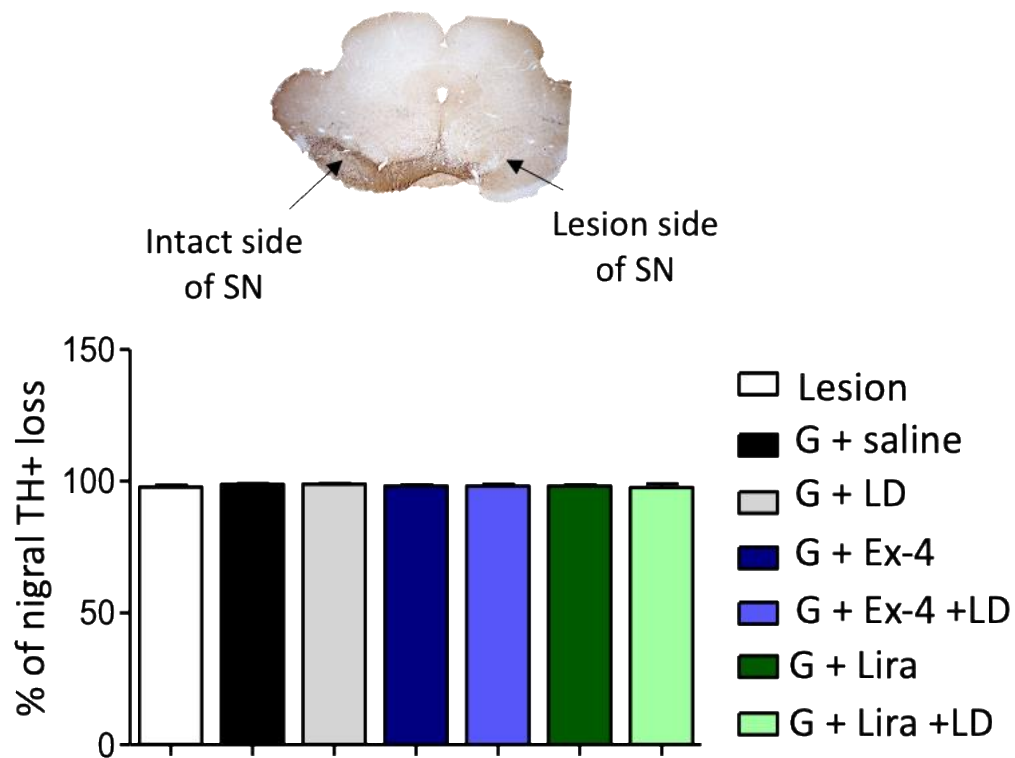

Supplementary figure S1. percentage of TH+ cells loss in the lesioned substantia nigra: more than 97% of nigral dopaminergic neurons was degenerated in the right hemisphere (lesioned side) compared to the intact side of all groups. SN= substantia nigra, G= graft; LD = L-dopa, Ex-4 = Exendin-4; Lira = Liraglutide.
